# Supplementary material for: Endemic fluoroquinolone-resistant Salmonella enterica serovar Kentucky ST198 in northern India
Source: PubMed Central journal article supplement (PMC6700665; doi:10.1099/mgen.0.000275), 2019-06-05
Supplement: mgen-5-275-s002.pdf [file mgen-5-275-s002.pdf]

Table 2a: Demographic details of NTS isolates.

| S. no | Location         | No of samples collected | Age groups | Male | Female | No of NTS isolated | No of S. Kentucky isolated |
|-------|------------------|-------------------------|------------|------|--------|--------------------|----------------------------|
| 1.    | Chandigarh       | 648                     | 0-2        | 2    | 0      | 2                  | 1                          |
|       |                  |                         | >2-5       | 0    | 0      | 0                  |                            |
|       |                  |                         | >5-15      | 0    | 0      | 0                  |                            |
|       |                  |                         | >15-40     | 2    | 3      | 5                  |                            |
|       |                  |                         | >40        | 1    | 2      | 3                  |                            |
|       |                  | Sub-total               |            | 5    | 5      | 10                 |                            |
| 2.    | Haryana          | 340                     | 0-2        | 3    | 2      | 5                  | 1                          |
|       |                  |                         | >2-5       | 1    | 0      | 1                  |                            |
|       |                  |                         | >5-15      | 0    | 0      | 0                  |                            |
|       |                  |                         | >15-40     | 0    | 0      | 0                  |                            |
|       |                  |                         | >40        | 0    | 1      | 1                  |                            |
|       |                  | Sub-total               |            | 4    | 3      | 7                  |                            |
| 3.    | Himachal Pradesh | 262                     | 0-2        | 0    | 0      | 0                  | 0                          |
|       |                  |                         | >2-5       | 0    | 0      | 0                  |                            |
|       |                  |                         | >5-15      | 0    | 0      | 0                  |                            |
|       |                  |                         | >15-40     | 0    | 0      | 0                  |                            |
|       |                  |                         | >40        | 0    | 1      | 1                  |                            |
|       |                  | Sub-total               |            | 0    | 1      | 1                  |                            |
| 4.    | Uttarakhand      | 189                     | 0-2        | 1    | 0      | 1                  | 0                          |
|       |                  |                         | >2-5       | 0    | 0      | 0                  |                            |
|       |                  |                         | >5-15      | 0    | 0      | 0                  |                            |
|       |                  |                         | >15-40     | 0    | 0      | 0                  |                            |
|       |                  |                         | >40        | 0    | 0      | 0                  |                            |
|       |                  | Sub-total               |            | 1    | 0      | 1                  |                            |
| 5.    | Rajasthan        | 87                      | 0-2        | 0    | 0      | 0                  | 0                          |
|       |                  |                         | >2-5       | 0    | 0      | 0                  |                            |
|       |                  |                         | >5-15      | 0    | 0      | 0                  |                            |
|       |                  |                         | >15-40     | 0    | 0      | 0                  |                            |
|       |                  |                         | >40        | 0    | 0      | 0                  |                            |
|       |                  | Sub-total               |            | 0    | 0      | 0                  |                            |
| 6.    | Punjab           | 386                     | 0-2        | 0    | 0      | 0                  | 4                          |
|       |                  |                         | >2-5       | 1    | 0      | 1                  |                            |
|       |                  |                         | >5-15      | 1    | 0      | 1                  |                            |
|       |                  |                         | >15-40     | 0    | 1      | 1                  |                            |
|       |                  |                         | >40        | 1    | 2      | 3                  |                            |
|       |                  | Sub-total               |            | 3    | 3      | 6                  |                            |
|       | Total            | 1912                    |            | 13   | 12     | 25                 | 6                          |

Table 2b. Age, sex, region and clinical presentation of patients from whom *Salmonella* Kentucky was isolated.

| S. no | Sample id | Source | Year of isolation | Location           | Patient details | Diagnosis                                          |
|-------|-----------|--------|-------------------|--------------------|-----------------|----------------------------------------------------|
| 1.    | 768/14    | Human  | 2014              | Amritsar, Punjab   | 60/F            | Acute myeloid leukaemia with acute gastroenteritis |
| 2.    | H243      | Human  | 2014              | Nayagaon, Punjab   | 66/F            | Acute gastroenteritis                              |
| 3.    | 1185/15   | Human  | 2015              | Mohali, Punjab     | 50/M            | Acute gastroenteritis with Chronic kidney disease  |
| 4.    | S207      | Human  | 2015              | Nawansahr, Punjab  | 23/F            | Acute gastroenteritis with Splenomegaly            |
| 5.    | 1414/16   | Human  | 2016              | Chandigarh         | 8 months/M      | Chronic diarrhoea                                  |
| 6.    | M706      | Human  | 2017              | Panchkula, Haryana | 2/M             | Acute gastroenteritis                              |
